# Supplementary material for: Macrophage migration inhibitory factor facilitates the therapeutic efficacy of mesenchymal stem cells derived exosomes in acute myocardial infarction through upregulating miR-133a-3p
Source: PubMed Central journal article supplement (PMC7916292; doi:10.1186/s12951-021-00808-5), 2021-02-27

**Supplementary table 1. Primer list**

| <b>Primers</b>          | <b>Sequences (5'-3')</b>     |
|-------------------------|------------------------------|
| hsa-miR-133a-3p Forward | ACACTCCAGCTGGGTTTGTCCCCTCAAC |
| hsa-miR-133a-3p Reverse | TGGTGTCGTGGAGTCG             |
| U6 Forward              | CTCGCTTCGGCAGCACA            |
| U6 Reverse              | AACGCTTCACGAATTTGCGT         |
| Cel-miR-39-3p Forward   | GGGTCACCGGGTGTAATC           |
| Cel-miR-39-3p Reverse   | GAGAGGAGAGGAAGAGGAA          |

**Supplementary table 2. Sequences list of miR-133a-3p mimics or inhibitor**

|                              | <b>Sequences (5'-3')</b> |
|------------------------------|--------------------------|
| hsa miR-133a-3p mimics       | UUUGGUCCCCUUCAACCAGC     |
| hsa miR-133a-3p mimics NC    | UUUUCCGAACGUUCACGUTT     |
| hsa miR-133a-3p inhibitor    | CCAGTACATCGCGGTGCACGT    |
| hsa miR-133a-3p inhibitor NC | CAGUACUUUUGUGUAGUACAA    |

**Supplementary table 3. Sequences list of MIF and siMIF**

| <b>MIF and siMIF</b> | <b>Sequences (5'-3')</b>                                                                                                                                                                                                                                                                                                                                                                                  |
|----------------------|-----------------------------------------------------------------------------------------------------------------------------------------------------------------------------------------------------------------------------------------------------------------------------------------------------------------------------------------------------------------------------------------------------------|
| MIF                  | ATGCCGATGTTTCATCGTAAACACCAACG<br>TGCCCCGCGCCTCCGTGCCGGACGGGTT<br>CCTCTCCGAGCTCACCCAGCAGCTGGC<br>GCAGGCCACCGGCAAGCCCCCCCAGTA<br>CATCGCGGTGCACGTGGTCCCGGACCA<br>GTCATGGCCTTCGGCGGCTCCAGCGAG<br>CCGTGCGCGCTCTGCAGCCTGCACAGCA<br>TCGGCAAGATCGGCGGCGCGCAGAACC<br>GCTCCTACAGCAAGCTGCTGTGCGGCCT<br>GCTGGCCGAGCGCCTGCGCATCAGCCC<br>GGACAGGGTCTACATCAACTATTACGAC<br>ATGAACGCGGCCAATGTGGGCTGGAAC<br>AACTCCACCTTCGCC |
| siMIF                | AGTACATCGCGGTGCACGT                                                                                                                                                                                                                                                                                                                                                                                       |

**Supplementary Figure 1. HUVECs and H9C2s were transfected by transfection reagents. (A) qRT-PCR showed that miR-133 mimics or inhibitor transfected HUVECs successfully. (B) qRT-PCR showed that miR-133 mimics or inhibitor transfected H9c2 cells successfully. (n=3). All data are mean  $\pm$  SEM. Statistical analysis was performed with t test. \*P < 0.05, \*\*P < 0.01, \*\*\*\*P < 0.0001.**

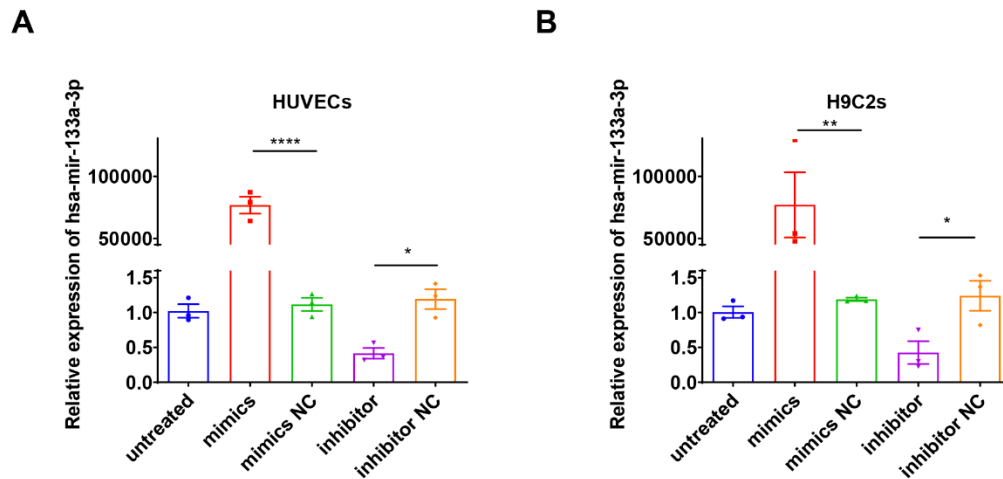

**Supplementary Figure 2. Gain and loss function of exosomal miR-133a-3p on pro-angiogenesis, proliferation, and apoptosis in HUVECs and H9c2 cells. (A)** Quantification analysis angiogenic effects in HUVECs with incubation of MIF-Exo and miR-133a-3p inhibitor (n = 3 biological replicates for each group). **(B)** Quantification analysis of proliferation effects in HUVECs with incubation of MIF-Exo and miR-133a-3p inhibitor (n = 3 biological replicates for each group; 5 random fields for each biological replicate). **(C)** Quantification analysis Apoptotic ability in H9c2 cells with incubation of MIF-Exo and miR-133a-3p inhibitor (n = 3 biological replicates for each group). Continuous variables were described by means  $\pm$  SEM and percentages. \* $P < 0.05$ ; \*\*\*\* $P < 0.0001$ ; NS, not significant.

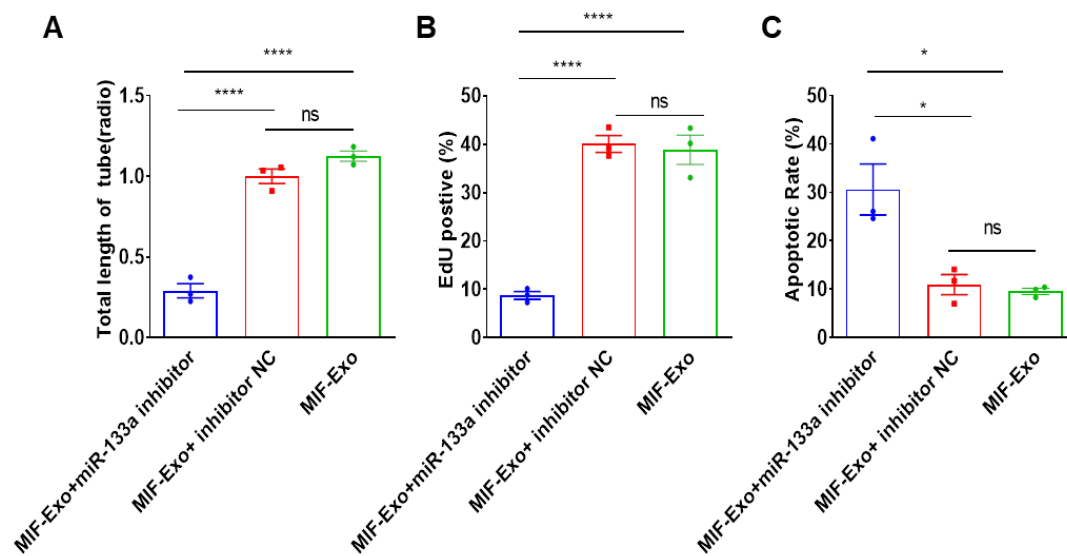

Supplement: 12951_2021_808_MOESM1_ESM.pdf [file 12951_2021_808_MOESM1_ESM.pdf]
